# Supplementary material for: Microscopic investigations on the surface-state dependent moisture stability of a hybrid perovskite
Source: Royal Society of Chemistry journal article supplement (doi:10.1039/c9nr10137c), 2020-01-01
Supplement: c9nr10137c1.pdf [file c9nr10137c1.pdf]

## Supporting Information

### **Microscopic investigations on surface-state dependent moisture stability of hybrid perovskite**

*Jing-Yuan Ma,<sup>ab</sup> Hui-Juan Yan,<sup>a</sup> Ming-Hua Li,<sup>a</sup> Jian-Kun Sun,<sup>a</sup> Yao-Xuan Chen,<sup>ab</sup> Dong Wang<sup>ab</sup>  
and Jin-Song Hu<sup>\*ab</sup>*

*<sup>a</sup> Beijing National Laboratory for Molecular Sciences (BNLMS), CAS Key Laboratory of Molecular Nanostructure and Nanotechnology, CAS Research/Education Center for Excellence in Molecule Science, Institute of Chemistry, Chinese Academy of Sciences, Beijing 100190, China*

*<sup>b</sup> University of Chinese Academy of Sciences, Beijing 100049, China*

*\* Correspondence author: Jin-Song Hu, hujs@iccas.ac.cn*

This files includes Figure S1 and S2.

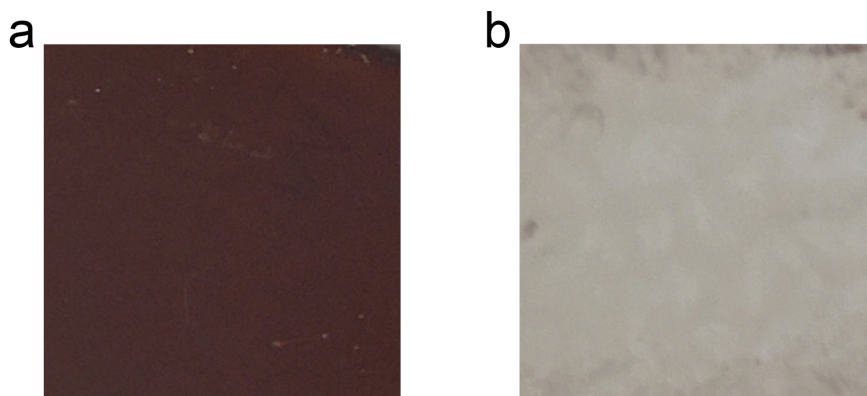

**Figure S1** Photographs of the pristine films stored in 80% humidity for (a) 4 h and (b) more than 8 h. Photos were taken while keeping the samples in humidity.

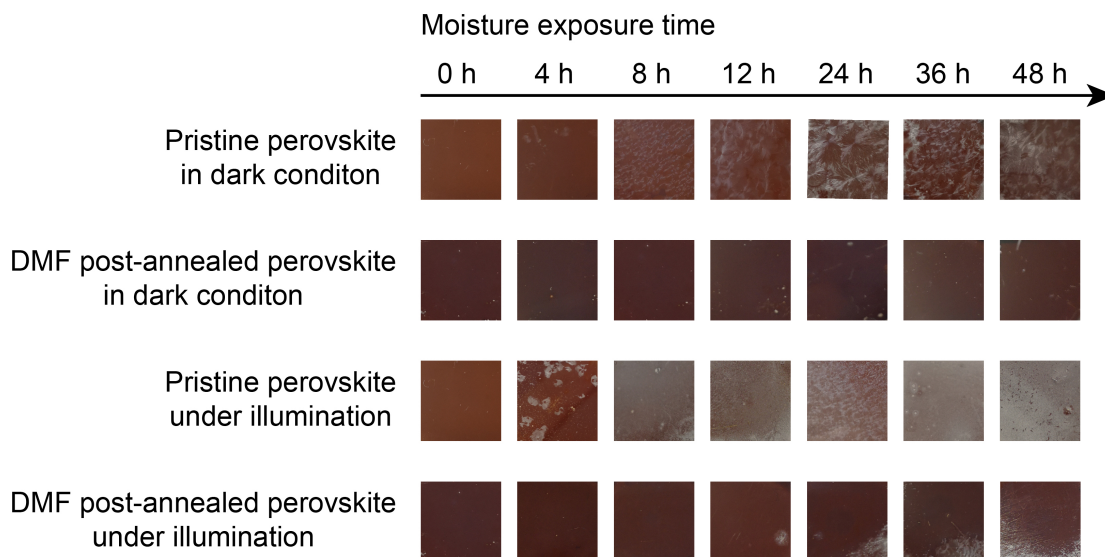

**Figure S2** Photographs of the perovskite films with different exposure time to 80% humidity, taken after a couple of minutes since the samples were moved out of moisture. The pristine films were prepared by anti-solvent method.

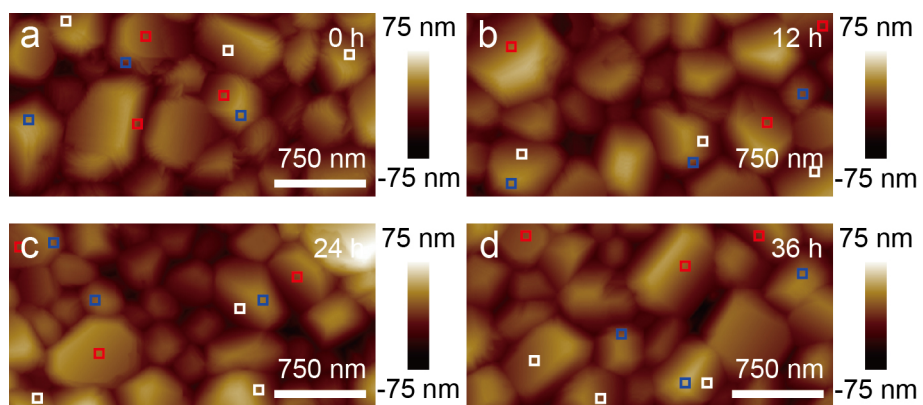

**Figure S3** Topographic images of DMF post-annealed films with exposure time in 80% humidity and dark conditions for 0 h (a), 12 h (b), 24 h (c) and 36 h (d). Sur-1, Sur-2 and Sur-3 are marked by red, blue and white squares, respectively.
